# Supplementary material for: Significant photocytotoxic effect of an iron(iii) complex of a Schiff base ligand derived from vitamin B6and thiosemicarbazide in visible light
Source: Royal Society of Chemistry journal article supplement (doi:10.1039/c5ra04207k), 2015-01-01
Supplement: c5ra04207k1.pdf [file c5ra04207k1.pdf]

## Electronic Supporting Information (ESI†)

for

### Significant photocytotoxic effect of an iron(III) complex of a Schiff base ligand derived from vitamin B<sub>6</sub> and thiosemicarbazide in visible light

Tukki Sarkar,<sup>a</sup> Samya Banerjee\*<sup>b</sup> and Akhtar Hussain\*<sup>a</sup>

<sup>a</sup> Department of Chemistry, Handique Girls' College, Guwahati-781001, Assam, India. [E-mail: [akhtariisc@gmail.com](mailto:akhtariisc@gmail.com); Tel: +91-36-12543793 for general correspondence].

<sup>b</sup> Department of Inorganic and Physical Chemistry, Indian Institute of Science, Bangalore-560 012, India. [E-mail: [samya@ipc.iisc.ernet.in](mailto:samya@ipc.iisc.ernet.in); Tel: +91-80-22932240].

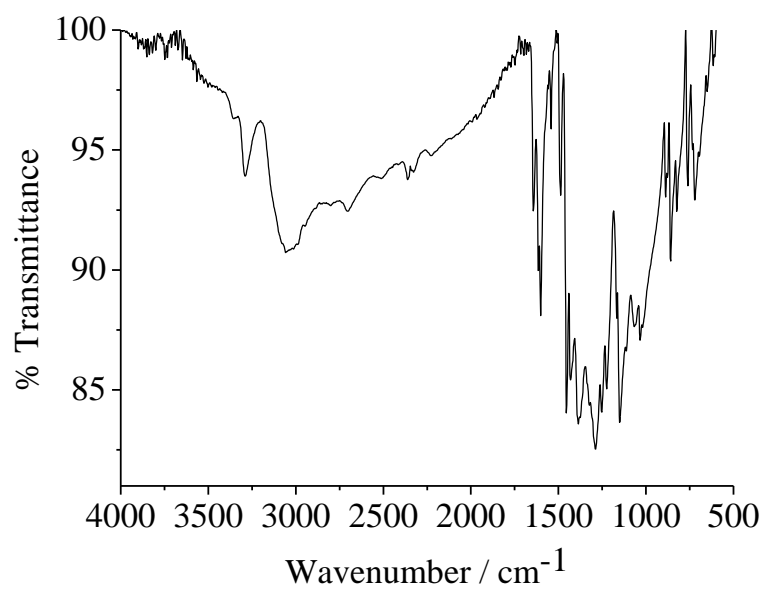

**Fig. S1** The IR spectrum of [Fe(tsc-py)<sub>2</sub>](NO<sub>3</sub>) (complex **1**).

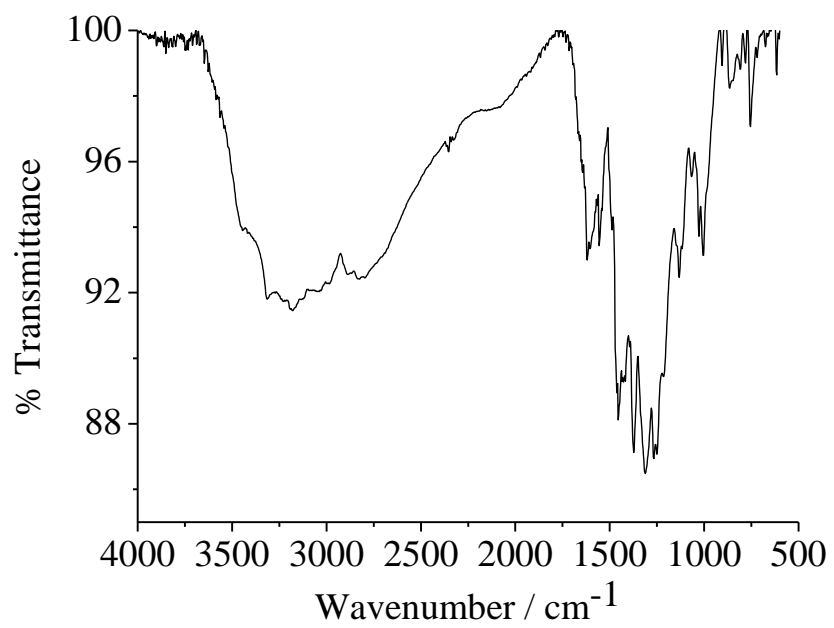

**Fig. S2** The IR spectrum of  $[\text{Fe}(\text{tsc-acpy})_2](\text{NO}_3)$  (complex **2**).

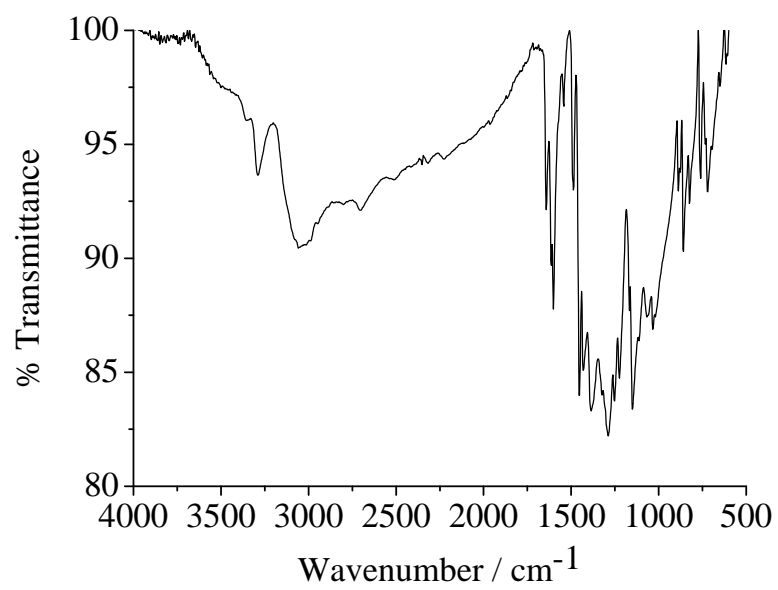

**Fig. S3** The IR spectrum of  $[\text{Fe}(\text{tsc-VB}_6)_2](\text{NO}_3)$  (complex **3**).

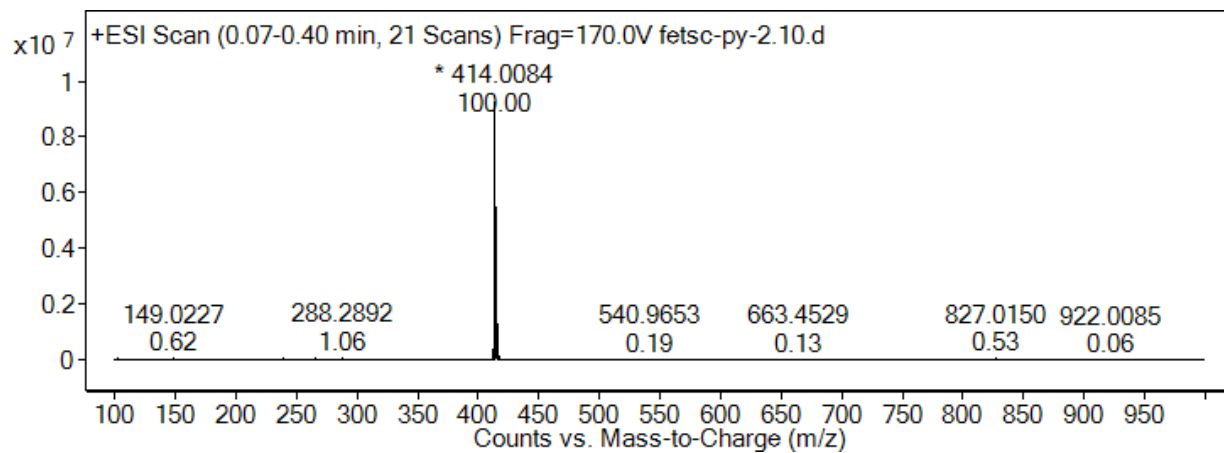

**Fig. S4** The ESI-MS spectrum of  $[\text{Fe}(\text{tsc-py})_2](\text{NO}_3)$  (complex **1**) in 10% aqueous methanol showing the  $[\text{M}-(\text{NO}_3)]^+$  peak.

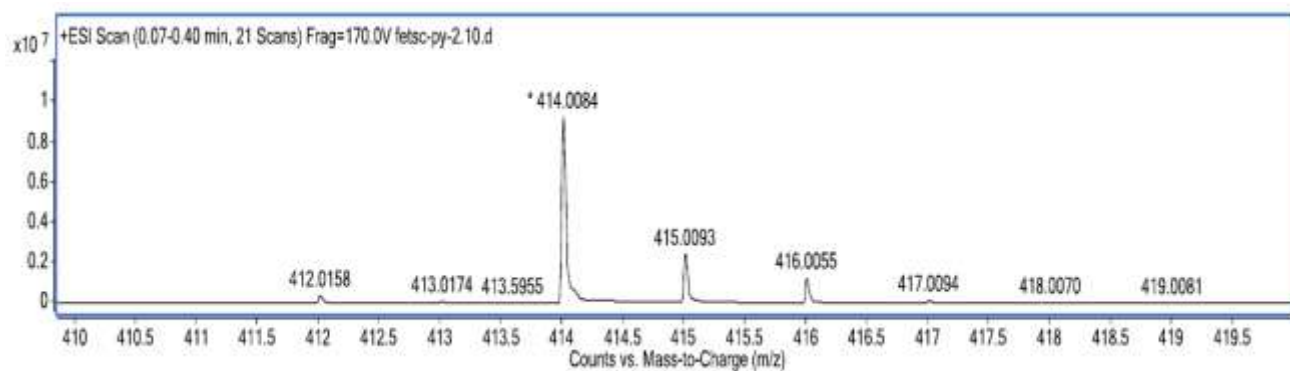

**Fig. S5** The isotopic distribution pattern for the  $[M-(NO_3^-)]^+$  peak of  $[Fe(tsc-py)_2](NO_3)$  (complex **1**) in the ESI-MS spectrum shown in Fig. S4.

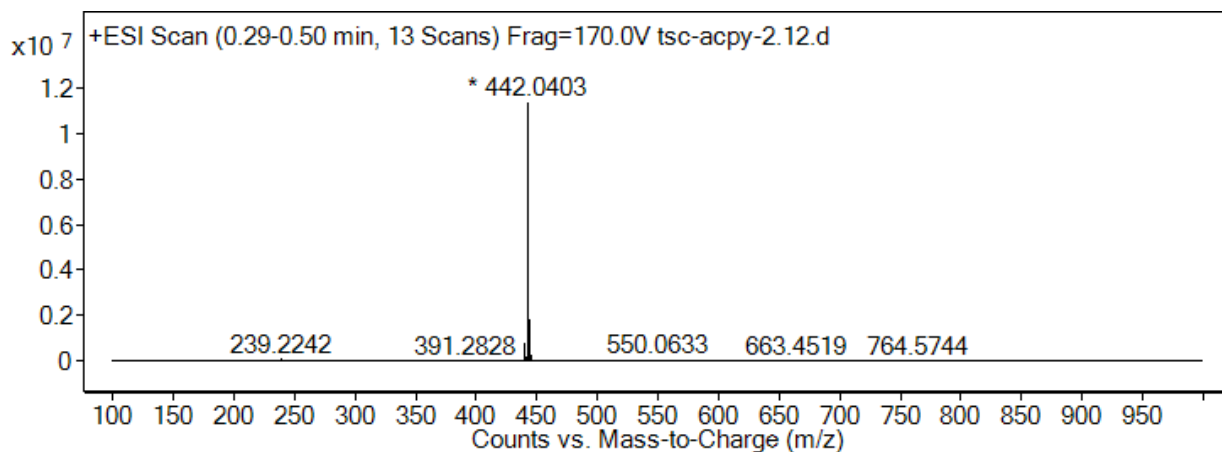

**Fig. S6** The ESI-MS spectrum of  $[\text{Fe}(\text{tsc-acpy})_2](\text{NO}_3)$  (complex **2**) in 10% aqueous methanol showing the  $[\text{M}-(\text{NO}_3)]^+$  peak.

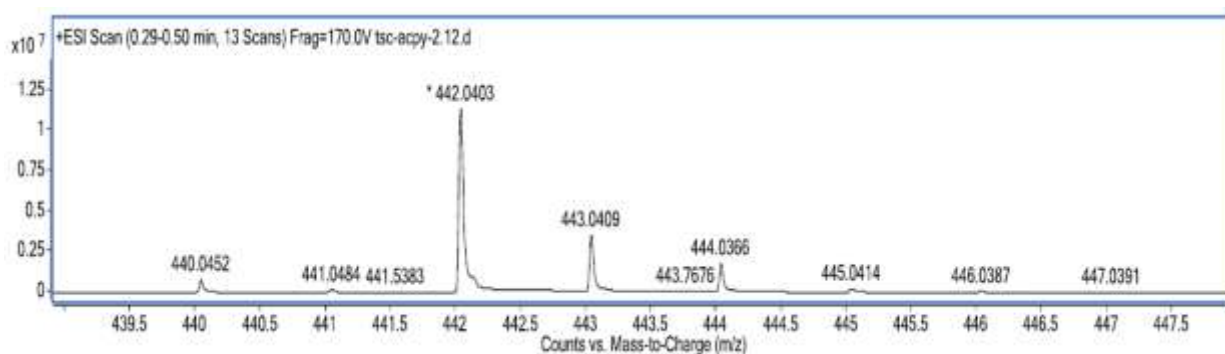

**Fig S7** The isotopic distribution pattern for the  $[\text{M}-(\text{NO}_3)]^+$  peak of  $[\text{Fe}(\text{tsc-acpy})_2](\text{NO}_3)$  (complex **2**) in the ESI-MS spectrum shown in Fig. S6.

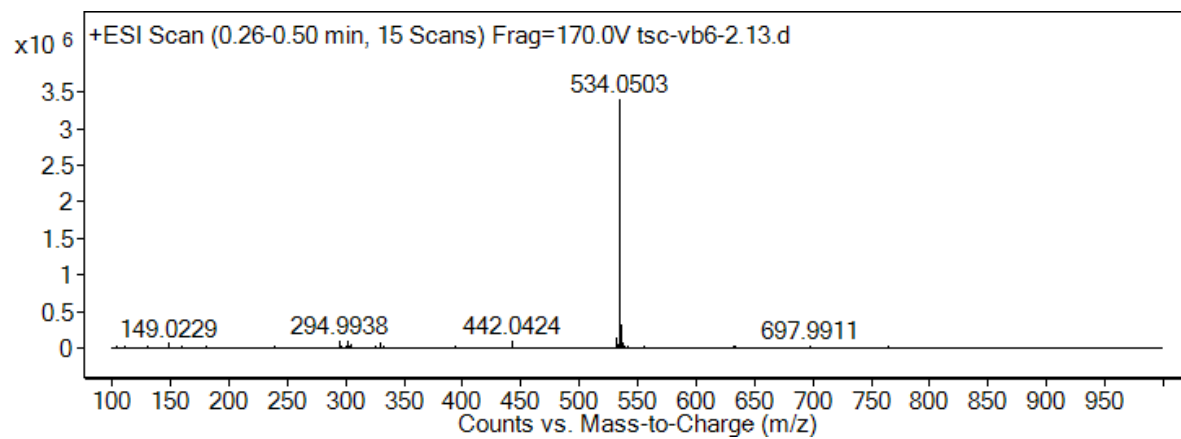

**Fig. S8** The ESI-MS spectrum of  $[\text{Fe}(\text{tsc-VB}_6)_2](\text{NO}_3)$  (complex **3**) in 10% aqueous methanol showing the  $[\text{M}-(\text{NO}_3)]^+$  peak.



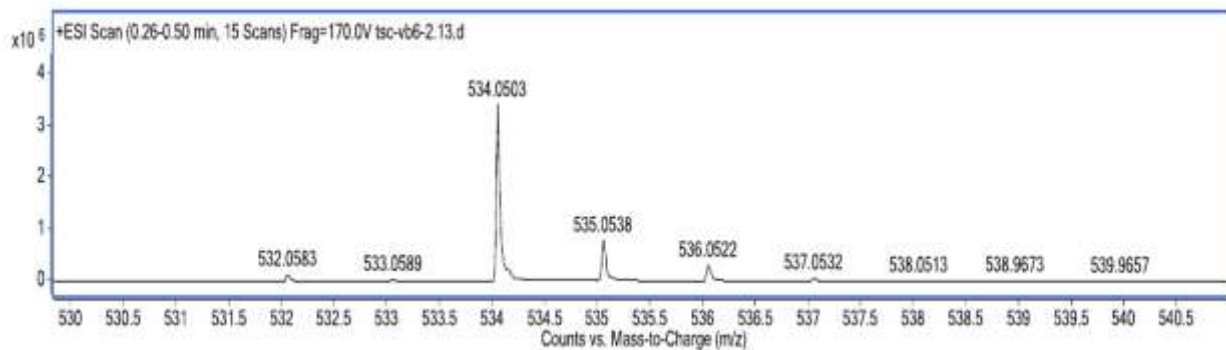

**Fig. S9** The isotopic distribution pattern for the  $[M-(NO_3)]^+$  peak of  $[Fe(tsc-VB_6)_2](NO_3)$  (complex **3**) in the ESI-MS spectrum shown in Fig. S8.

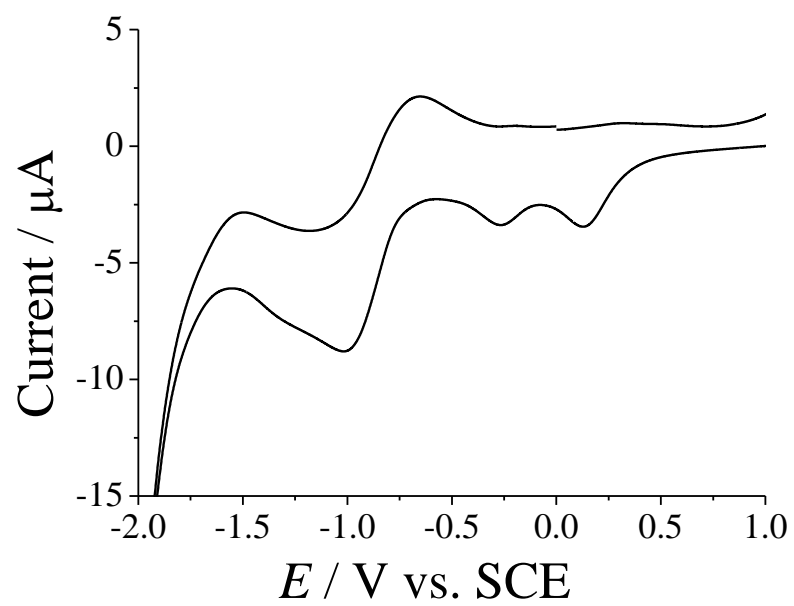

**Fig. S10** The cyclic voltammogram of complex **2** in DMF (0.1 M TBAP) showing the cathodic and anodic peaks.

**Table S1** Cathodic and anodic peak potentials (Volt vs SCE) for complexes **1-3**.

| Complex  | $E_{pc1}$ | $E_{pc2}$ | $E_{pa1}$ | $E_{pa2}$ | $E_{pa3}$ |
|----------|-----------|-----------|-----------|-----------|-----------|
| <b>1</b> | -1.51     | -0.66     | -1.01     | -0.27     | 0.13      |
| <b>2</b> | -0.74     | -0.14     | -1.14     | -0.23     | 0.19      |
| <b>3</b> | -0.89     | 0.49      | -1.27     | 0.21      | -0.52     |

**Note:**  $E_{pc}$  and  $E_{pa}$  are the cathodic and anodic peak potentials, respectively.

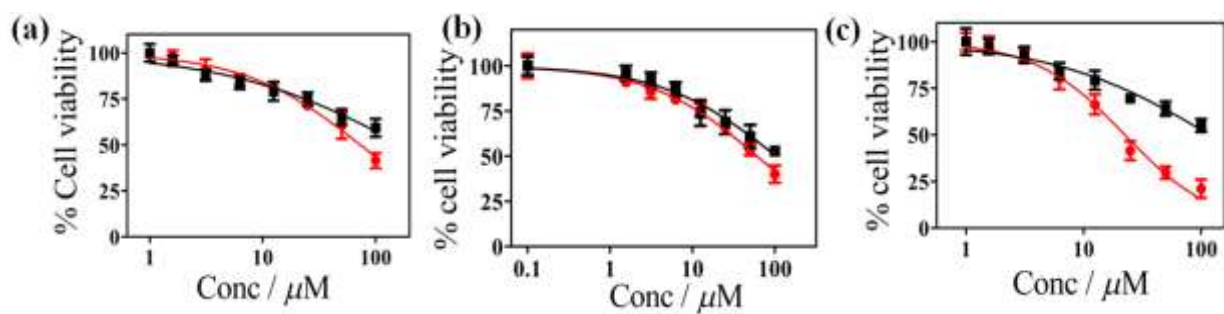

**Fig. S11** Cell viability plots showing the photocytotoxicity of the complexes **1** (in a), **2** (in b) and **3** (in c) in visible light (red circles) and dark (black squares) in HeLa cells on 4 h incubation in dark followed by exposure to visible light (400-700 nm,  $10 \text{ J cm}^{-2}$ ) for 1 h, as determined from the MTT assay.
